# Supplementary material for: Prediction Model of Extubation Outcomes in Critically Ill Patients: A Multicenter Prospective Cohort Study
Source: MDPI journal article supplement (doi:10.3390/jcm11092520), 2022-04-29
Supplement: s1 [file s1]

## Supplementary Materials

**Table S1.** Details of weaning readiness tests

**Table S2.** Process of weaning and additional data prior to extubation

**Table S3.** Respiratory support within 48 hours of extubation

**Figure S1.** Effects of the eight predefined physiological factors on extubation outcomes within 48 h

**Figure S2.** A screenshot of the online calculator that provides the predicted probabilities of successful and uneventful extubations after a successful 30-min SBT for patients with a low risk of upper airway obstruction.

**Table S1.** Details of weaning readiness tests

|                                                                                                                                                                                                                                                                                                                                                                                                                                                                                                                                                                                                                                                                                                                                                                                                                                                                                                                                                                                                                                                                                                                                                                                                                                             |
|---------------------------------------------------------------------------------------------------------------------------------------------------------------------------------------------------------------------------------------------------------------------------------------------------------------------------------------------------------------------------------------------------------------------------------------------------------------------------------------------------------------------------------------------------------------------------------------------------------------------------------------------------------------------------------------------------------------------------------------------------------------------------------------------------------------------------------------------------------------------------------------------------------------------------------------------------------------------------------------------------------------------------------------------------------------------------------------------------------------------------------------------------------------------------------------------------------------------------------------------|
| <p><b>Spontaneous breathing trial (SBT)</b></p> <p>Patients were determined to qualify for SBT when they exhibited improvement in or a resolution of the underlying respiratory failure or cause of mechanical ventilation, sufficient oxygenation and inspiratory effort, hemodynamic stability, and an adequate respiratory pattern, in accordance with standard clinical practices for weaning strategies driven by national consensus. The SBT was abandoned if a patient met the following interruption criteria: respiratory rate <math>\geq 30</math> breaths/min, significant deterioration of oxygenation (<math>\text{SpO}_2 &lt; 94\%</math>, <math>\text{PaO}_2 &lt; 70</math> mmHg), deterioration of hemodynamic stability (heart rate <math>\geq 140</math> beats/min, newly developed arrhythmia, or signs of myocardial ischemia), a significant increase in blood pressure after SBT initiation, or appearance of respiratory distress (defined as paradoxical breathing, use of accessory muscles, sweating, or agitation). Suitability for extubation was determined based on the results of a 30-min SBT with a positive end-expiratory pressure of 5 cmH<sub>2</sub>O and pressure support of 5 cmH<sub>2</sub>O.</p> |
| <p><b>Cuff leak test (CLT)</b></p> <p>Prior to endotracheal extubation, the patient underwent intraoral and intratracheal suctioning in preparation for the CLT. Assist-control ventilation mode was used for the CLT, in accordance with the standard clinical practices of the participating institutions, and the displayed expiratory tidal volume was monitored while the endotracheal tube cuff was in the inflated position. The cuff was then deflated, and the following six respiratory cycles were monitored to eliminate erroneous values. The difference between the expiratory tidal volume with the cuff inflated and the average of the three lowest expiratory tidal volumes during the six respiratory cycles with the cuff deflated was defined as the cuff leak volume. Additionally, the percent cuff leak, which was defined as the percentage of the cuff leak volume relative to the expiratory tidal volume with the cuff inflated, was calculated. A low risk of upper airway obstruction was confirmed based on a negative CLT result, a cuff leak volume <math>&gt; 110</math> mL, and a percent of cuff leak <math>&gt; 10\%</math>.</p>                                                                       |

*SBT*: spontaneous breathing trial, *CLT*: cuff leak test

**Table S2.** Process of weaning and additional data prior to extubation

| Variables                                                      | Total cohort<br>(n=499)         | Uneventful<br>extubation<br>(n=328) <sup>a</sup> | Noninvasive<br>respiratory<br>support<br>(n=125) <sup>b</sup> | Reintubation<br>(n=46)          | P value | Missing<br>(%) |
|----------------------------------------------------------------|---------------------------------|--------------------------------------------------|---------------------------------------------------------------|---------------------------------|---------|----------------|
| Process of weaning                                             |                                 |                                                  |                                                               |                                 |         |                |
| Method of weaning,<br>n (%)                                    |                                 |                                                  |                                                               |                                 |         |                |
| Once-daily SBT                                                 | 28 (5.6%)                       | 18 (5.5%)                                        | 9 (7.2%)                                                      | 1 (2.2%)                        | 0.398   | 0              |
| Multiple daily<br>SBTs                                         | 3 (0.6%)                        | 1 (0.3%)                                         | 1 (0.8%)                                                      | 1 (2.2%)                        |         |                |
| Gradual reduction<br>of pressure support                       | 468 (93.8%)                     | 309 (94.2%)                                      | 115 (92.0%)                                                   | 44 (95.7%)                      |         |                |
| SBT attempts                                                   | 1 (1–1)                         | 1 (1–1)                                          | 1 (1–1)                                                       | 1 (1–1)                         | 0.422   | 0              |
| Data during 24 h prior to<br>the extubation                    |                                 |                                                  |                                                               |                                 |         |                |
| Fever ( $\geq 38^{\circ}\text{C}$ ), n (%)                     | 167 (33.5%)                     | 108 (32.9%)                                      | 45 (36.0%)                                                    | 14 (30.4%)                      | 0.743   | 0              |
| Use of sedatives, n (%)                                        | 466 (93.4%)                     | 304 (92.7%)                                      | 119 (95.2%)                                                   | 43 (93.5%)                      | 0.628   | 0              |
| Use of neuromuscular<br>blocker, n (%)                         | 1 (0.2%)                        | 1 (0.3%)                                         | 0 (0.0%)                                                      | 0 (0.0%)                        | 0.77    | 0              |
| Use of opioids, n (%)                                          | 342 (68.5%)                     | 222 (67.7%)                                      | 89 (71.2%)                                                    | 31 (67.4%)                      | 0.76    | 0              |
| Use of steroids<br>(methylprednisolone<br>$\geq 20$ mg), n (%) | 72 (14.4%)                      | 47 (14.3%)                                       | 18 (14.4%)                                                    | 7 (15.2%)                       | 0.987   | 0              |
| Use of vasopressors,<br>n (%)                                  | 301 (60.3%)                     | 197 (60.1%)                                      | 76 (60.8%)                                                    | 28 (60.9%)                      | 0.989   | 0              |
| CVP, mmHg                                                      | 8 (6–10)                        | 8 (6–10)                                         | 9 (6–11)                                                      | 8 (7–11)                        | 0.327   | 15             |
| Laboratory data                                                |                                 |                                                  |                                                               |                                 |         |                |
| White blood cells, $\mu\text{L}$                               | 9,600<br>(7,165–<br>12,320)     | 9,645<br>(7,413–<br>12,563)                      | 9,720<br>(7,100–<br>12,300)                                   | 8,750<br>(6,855–<br>10,330)     | 0.105   | 0              |
| Hemoglobin, g/dL                                               | 10.4<br>(9.4–11.4)              | 10.4<br>(9.5–11.4)                               | 10.4<br>(9.3–11.4)                                            | 10.2<br>(9.3–11.2)              | 0.724   | 0              |
| Platelets, $\text{mm}^3$                                       | 106,000<br>(75,000–<br>166,000) | 106,000<br>(75,500–<br>165,000)                  | 97,500<br>(69,000–<br>170,250)                                | 103,000<br>(79,750–<br>171,000) | 0.643   | 0.4            |
| Creatinine, $\mu\text{mol/L}$                                  | 84.9<br>(58.3–154.3)            | 82.2<br>(58.3–155.8)                             | 90.2<br>(61.9–159.1)                                          | 80.9<br>(53.9–119.1)            | 0.428   | 0              |
| Lactate, mmol/L                                                | 1.0 (0.8–1.3)                   | 1.0 (0.8–1.3)                                    | 1.0 (0.8–1.3)                                                 | 0.9 (0.7–1.1)                   | 0.158   | 0              |
| Time from SBT to<br>extubation, h                              | 1.1 (0.5–2.9)                   | 1.1 (0.5–2.8)                                    | 1.2 (0.5–3.7)                                                 | 1.2 (0.6–2.5)                   | 0.832   | 0              |

Data are expressed as medians (interquartile range) or n (%).

<sup>a</sup> Uneventful extubation was defined as the non-requirement of reintubation or noninvasive respiratory support within 48 h post extubation.

<sup>b</sup> Patients in the noninvasive respiratory support group were administered NIV or HFNO within 48 h post extubation (without reintubation).

SBT, spontaneous breathing trial, CVP, central venous pressure

**Table S3.** Respiratory support within 48 hours of extubation

| Variables                               | Total cohort    | Uneventful extubation <sup>a</sup> | Noninvasive respiratory support <sup>b</sup> | Reintubation    | Missing (%) |
|-----------------------------------------|-----------------|------------------------------------|----------------------------------------------|-----------------|-------------|
| NIV use, n (%)                          | 48 (9.6%)       | 0 (0%)                             | 37 (29.6%)                                   | 11 (23.9%)      | 0           |
| Cause of NIV use, n (%)                 |                 |                                    |                                              |                 |             |
| Refractory hypoxemia                    | 18 (3.6%)       | 0 (0%)                             | 12 (9.6%)                                    | 7 (15.2%)       |             |
| Increased breathing effort              | 10 (2.0%)       | 0 (0%)                             | 7 (5.6%)                                     | 3 (6.5%)        |             |
| Heart failure                           | 4 (0.8%)        | 0 (0%)                             | 3 (2.4%)                                     | 1 (2.2%)        |             |
| Prophylactic                            | 15 (3.0%)       | 0 (0%)                             | 15 (12.0%)                                   | 0 (0%)          |             |
| HFNO use, n (%)                         | 122 (24.4%)     | 0 (0%)                             | 103 (82.4%)                                  | 19 (41.3%)      | 0           |
| Cause of HFNO use, n (%)                |                 |                                    |                                              |                 |             |
| Refractory hypoxemia                    | 30 (6.0%)       | 0 (0%)                             | 21 (16.8%)                                   | 9 (19.6%)       |             |
| Increase of work of breathing           | 14 (2.8%)       | 0 (0%)                             | 9 (7.2%)                                     | 5 (10.9%)       |             |
| Heart failure                           | 6 (1.2%)        | 0 (0%)                             | 6 (4.8%)                                     | 0 (0%)          |             |
| Prophylactic                            | 72 (14.4%)      | 0 (0%)                             | 67 (53.6%)                                   | 5 (10.9%)       |             |
| Use of NIV or HFNO, n (%)               | 149 (29.9%)     | 0 (0%)                             | 125 (100%)                                   | 24 (52.2%)      | 0           |
| Time from extubation to reintubation, h | 10.0 (2.6–23.6) | –                                  | –                                            | 10.0 (2.6–23.6) |             |
| Cause of reintubation, n (%)            |                 |                                    |                                              |                 |             |
| Cardiac arrest                          | 1 (0.2%)        | 0 (0%)                             | 0 (0%)                                       | 1 (2.2%)        |             |
| Refractory hypoxemia                    | 29 (5.8%)       | 0 (0%)                             | 0 (0%)                                       | 29 (63.0%)      |             |
| Hemodynamic instability                 | 2 (0.4%)        | 0 (0%)                             | 0 (0%)                                       | 2 (4.3%)        |             |
| Excessive secretion                     | 7 (1.4%)        | 0 (0%)                             | 0 (0%)                                       | 7 (15.2%)       |             |
| Upper airway obstruction                | 5 (1.0%)        | 0 (0%)                             | 0 (0%)                                       | 5 (10.9%)       |             |
| Agitation                               | 1 (0.2%)        | 0 (0%)                             | 0 (0%)                                       | 1 (2.2%)        |             |
| Loss of consciousness                   | 1 (0.2%)        | 0 (0%)                             | 0 (0%)                                       | 1 (2.2%)        |             |

Data are expressed as medians (interquartile range) or n (%).

<sup>a</sup> Uneventful extubation was defined as the non-requirement of reintubation or noninvasive respiratory support within 48 h post extubation.

<sup>b</sup> Patients in the noninvasive respiratory support group were administered NIV or HFNO within 48 h post extubation (without reintubation).

NIV: noninvasive ventilation, HFNO: high-flow nasal oxygen

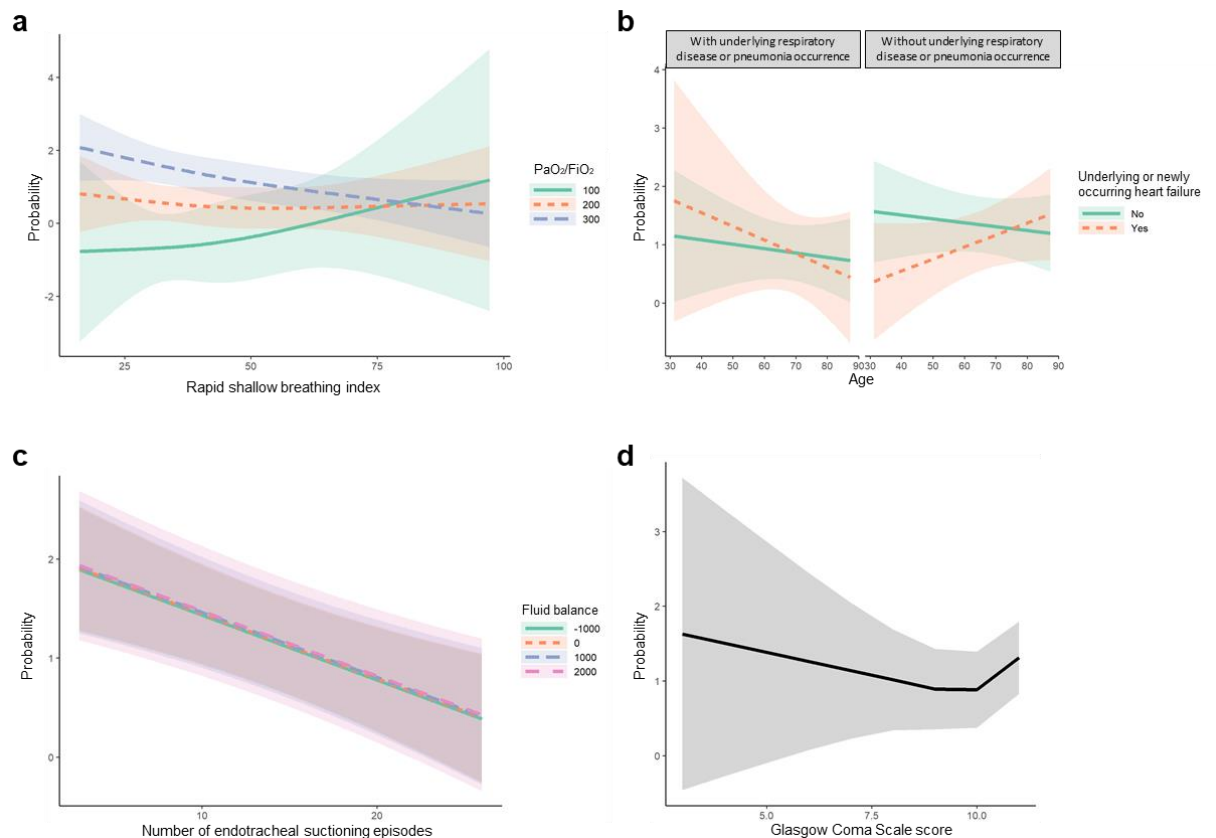

**Figure S1.** Effects of the eight predefined physiological factors on extubation outcomes within 48 h.

Probability of a trend towards a favorable extubation outcome (from reintubation to the use of noninvasive respiratory support [without reintubation] to uneventful extubation) according to the eight designated physiological predictors: rapid shallow breathing index and  $\text{PaO}_2/\text{FiO}_2$  (a); age, underlying or newly occurring heart failure, and underlying respiratory disease or pneumonia occurrence (b); fluid balance and the number of endotracheal suctioning episodes during the previous 24 h (c); and Glasgow Coma Scale score (d). Four hundred fifty-six patients (91.4%) had  $\text{PaO}_2/\text{FiO}_2 \geq 200$ , and 486 patients (97.4%) had Glasgow Coma Scale scores  $\geq 8$  points.
